# Supplementary material for: Nonreciprocal charge transport at topological insulator/superconductor interface
Source: Springer Nature journal article supplement (doi:10.1038/s41467-019-10658-3), 2019-06-21
Supplement: 41467_2019_10658_MOESM2_ESM.pdf [file 41467_2019_10658_MOESM2_ESM.pdf]

Editorial Note: This manuscript has been previously reviewed at another journal that is not operating a transparent peer review scheme. The manuscript was considered suitable for publication without further review at Nature Communications .
